# Supplementary material for: Human papillomavirus type 18 E5 oncogene supports cell cycle progression and impairs epithelial differentiation by modulating growth factor receptor signalling during the virus life cycle
Source: PubMed Central journal article supplement (PMC5732752; doi:10.18632/oncotarget.21658), 2017-10-06
Supplement: oncotarget-08-103581-s001.pdf [file oncotarget-08-103581-s001.pdf]

## Human papillomavirus type 18 E5 oncogene supports cell cycle progression and impairs epithelial differentiation by modulating growth factor receptor signalling during the virus life cycle

### SUPPLEMENTARY MATERIALS

**Supplementary Table 1: List of all primer sequences used in this study**

| Name            | Sequence 5' – 3'             | Application               |
|-----------------|------------------------------|---------------------------|
| FwdE5stopmutant | gctgtagtaccatgtAatcacttatt   | site directed mutagenesis |
| RevE5stopmutant | acatattggactacagcatatgtattac | site directed mutagenesis |
| HPV18 seq A     | atagacagccaaatacag           | HPV18 genome sequencing   |
| HPV18 seq B     | actgtcggcgtagtga             | HPV18 genome sequencing   |
| HPV18 seq C     | actatatcttctgcctct           | HPV18 genome sequencing   |
| HPV18 seq D     | aggtgtggccttagtgg            | HPV18 genome sequencing   |
| HPV18 seq E     | aggtgtggccttagtgg            | HPV18 genome sequencing   |
| HPV18 seq F     | attgcattgtatggtatg           | HPV18 genome sequencing   |
| HPV18 seq G     | accgaaaacggtcgggac           | HPV18 genome sequencing   |
| HPV18 seq H     | atggagttaatcatcaac           | HPV18 genome sequencing   |
| HPV18 seq I     | atagtggtatggctgtt            | HPV18 genome sequencing   |
| HPV18 seq J     | agtagtggtgcagcacta           | HPV18 genome sequencing   |
| KGFRfwd         | CAGGGGTCTCCGAGTATGAA         | qRT-PCR                   |
| KGFR rev        | TCTAAAGGCAACCTCCGAGA         | qRT-PCR                   |
| U6 fwd          | CTC GCT TCG GCA GCA CA       | qRT-PCR                   |
| U6 rev          | AAC GCT TCA CGC ATT TGC      | qRT-PCR                   |
